# Supplementary material
Source: PubMed Central journal article supplement (PMC6760998)
Supplement: NIHMS1535927-supplement-1.pdf [file NIHMS1535927-supplement-1.pdf]

# Piersma et al, Supplementary Figure 1

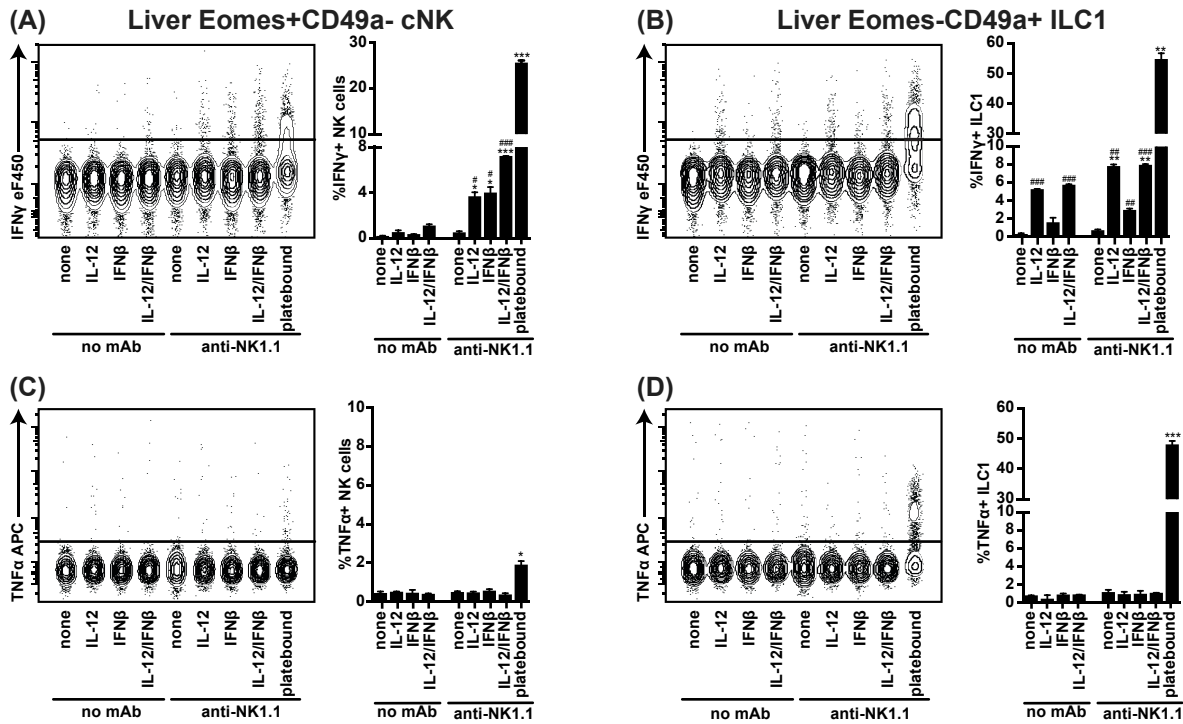

**Figure 1: cNK versus ILC1 have differential requirements for cytokine production.**

Liver single cell suspensions from WT mice were stimulated in the presence of soluble or plate-bound antibody and the indicated cytokines. NKp46+Eomes+CD49a- cNK cells (A, C) or NKp46+Eomes-CD49a+ ILC1 (B, D) were analyzed for IFNγ (A, B) and TNFα production (B, D). The \*-symbols indicate statistical comparison to same condition without antibody, the #-symbols indicate comparison to soluble antibody only or unstimulated within the same group. ### or \*\*\*p<0.001, ## or \*\*p<0.01, # or \*p<0.05, ns= not significant.

## Piersma et al, Supplementary Figure 2

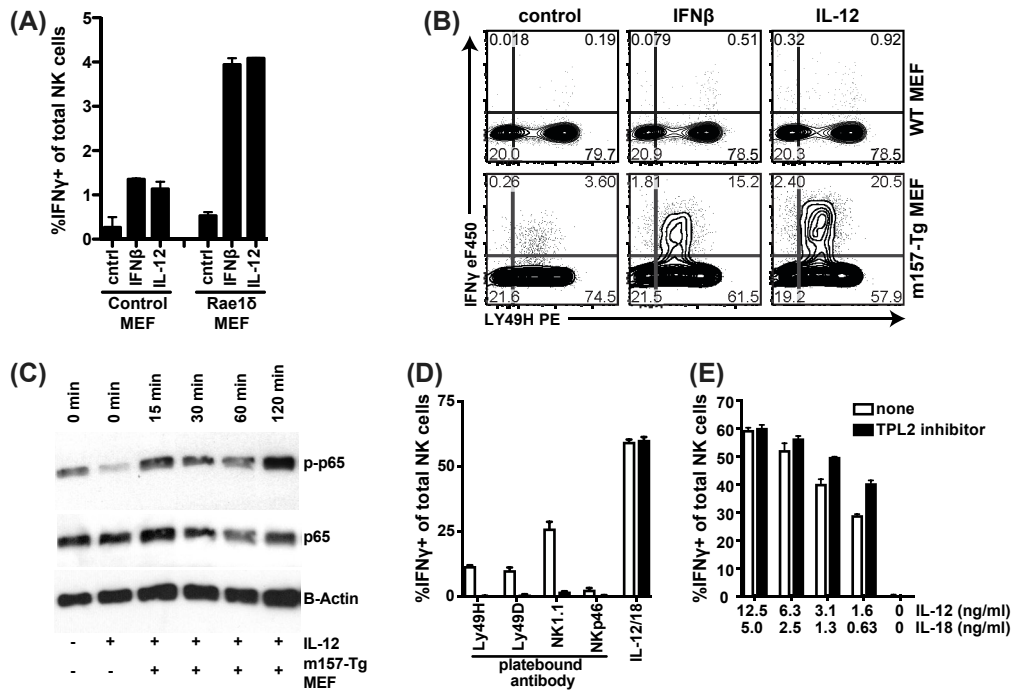

**Figure 2: Requirements for dual signaling in response to Rae1 $\delta$  and m157-Tg stimulation.** (A) Splenocytes from WT mice were mixed with Rae1 $\delta$  or WT MEF in the presence of the indicated cytokines. IFN $\gamma$  production by NK cells are shown. (B) Purified NK cells were stimulated with m157-Tg or WT MEF in the presence or absence of IFN $\beta$  or IL-12. (C) Purified NK cells were pre-stimulated with IL-12, after which the NK cells were stimulated with m157-Tg MEF for the indicated time. B-actin, phospho-p65 and were analyzed by western blot. (D) percentage of IFN $\gamma$ + NK cells from Figure 5G. (E) Splenocytes were stimulated with indicated concentration of IL-12 and IL-18 in the presence or absence of 9  $\mu$ M TPL2 inhibitor. Percent of IFN $\gamma$  producing NK cells are shown.

Piersma et al, supplemental Figure 3

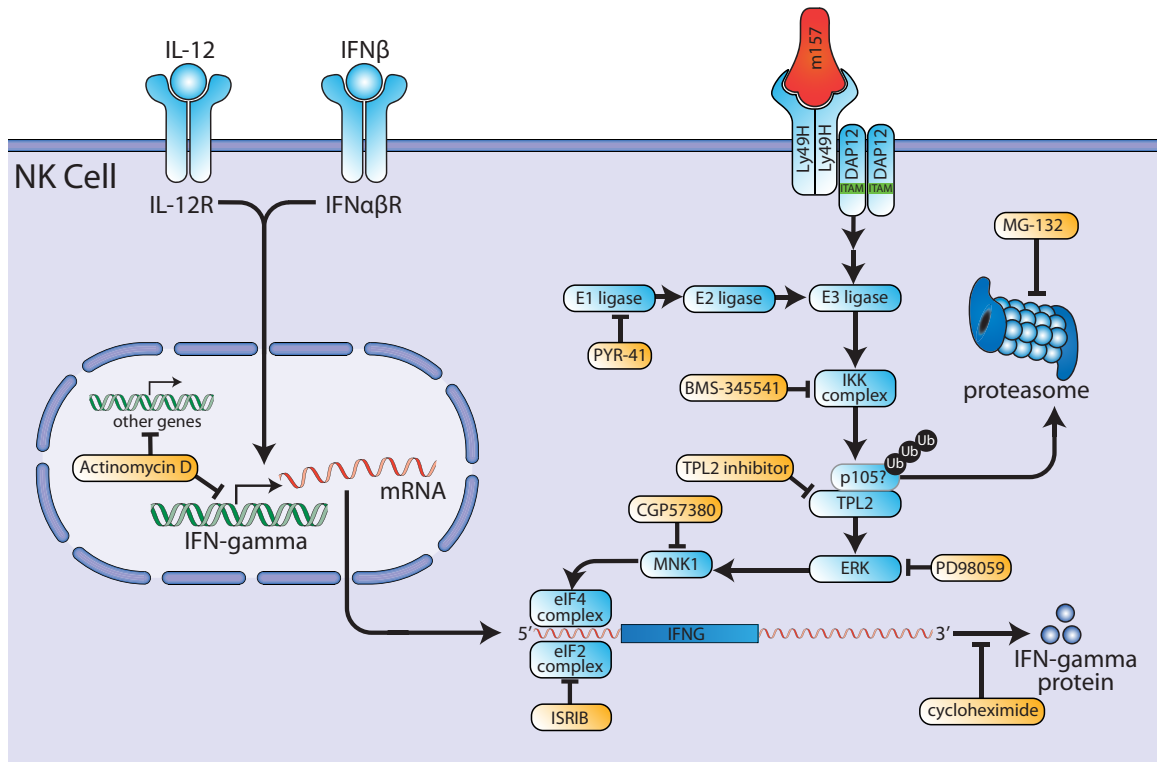

**Figure 3: Model of activation receptor dependent IFN $\gamma$  production.** Cytokines such as IL-12 and IFN-I that are produced during virus infection induce transcription of Ifng. Upon recognition of a virus-infected cells through ligand-receptor interactions, such as m157-Ly49H NK cells signal through the Ubiquitin-IKK-TPL2-ERK-MNK1-eIF4 axis to initiate translation of Ifng mRNA into protein. Indicated in orange are the pharmacological inhibitors used in this study and their targets.
